# Supplementary material for: How to stay out of trouble in RIXS calculations within equation-of-motion coupled-cluster damped response theory? Safe hitchhiking in the excitation manifold by means of core–valence separation
Source: Royal Society of Chemistry journal article supplement (doi:10.1039/c9cp03688a), 2019-09-25
Supplement: c9cp03688a1.pdf [file c9cp03688a1.pdf]

# How to stay out of trouble in RIXS calculations within equation-of-motion coupled-cluster damped response theory?

## Safe hitchhiking in the excitation manifold by means of core-valence separation.

### Supporting information.

Kaushik D. Nanda<sup>a,\*</sup>, Marta L. Vidal<sup>b</sup>, Rasmus Faber<sup>b</sup>, Sonia Coriani<sup>b</sup>, and Anna I. Krylov<sup>a,c</sup>

<sup>a</sup> Department of Chemistry, University of Southern California, Los Angeles, California 90089-0482

<sup>b</sup> DTU Chemistry - Department of Chemistry, Technical

University of Denmark, DK-2800, Kongens Lyngby, Denmark

<sup>c</sup> The Hamburg Centre for Ultrafast Imaging, Luruper Chaussee 149, 22671 Hamburg, Germany

## 1. ITERATIVE SCHEME FOR SOLVING DAMPED RESPONSE EQUATIONS

### 1.1. Iterative scheme for left response

For the left response equation given by [note that RHS in the equation below is different from RHS of Eq. (23) in the paper]

$$\left(\tilde{X}_{\text{Re}} + i\tilde{X}_{\text{Im}}\right) (\bar{H} - E_0 - (\omega + i\gamma)) = \tilde{D}, \quad (\text{S1})$$

the corresponding iterative step is given by

$$\begin{aligned} & \left(\tilde{X}_{\text{Re}}^{(n+1)} + i\tilde{X}_{\text{Im}}^{(n+1)}\right) \\ &= \left(\tilde{X}_{\text{Re}}^{(n)} + i\tilde{X}_{\text{Im}}^{(n)}\right) + \frac{\tilde{D} - \left(\tilde{X}_{\text{Re}}^{(n)} + i\tilde{X}_{\text{Im}}^{(n)}\right) (\bar{H} - E_0 - (\omega + i\gamma))}{(\bar{H} - E_0 - (\omega + i\gamma))^D} \\ &= \left(\tilde{X}_{\text{Re}}^{(n)} + i\tilde{X}_{\text{Im}}^{(n)}\right) \\ & \quad + \frac{\left(\tilde{D} - \left(\tilde{X}_{\text{Re}}^{(n)} + i\tilde{X}_{\text{Im}}^{(n)}\right) (\bar{H} - E_0 - \omega - i\gamma)\right) (\bar{H} - E_0 - \omega + i\gamma)^D}{(\bar{H}^D - E_0 - \omega)^2 + \gamma^2} \\ &= \left(\tilde{X}_{\text{Re}}^{(n)} + i\tilde{X}_{\text{Im}}^{(n)}\right) + \frac{\left(\tilde{B}_{\text{Re}}^{(n)} - i\tilde{B}_{\text{Im}}^{(n)}\right) (\bar{H} - E_0 - \omega + i\gamma)^D}{(\bar{H}^D - E_0 - \omega)^2 + \gamma^2}, \end{aligned} \quad (\text{S2})$$

where  $\tilde{B}_{\text{Re}}$  and  $\tilde{B}_{\text{Im}}$  are the residuals given by

$$\tilde{B}_{\text{Re}}^\mu = \tilde{D}^\mu - \tilde{\sigma}_{\text{Re}}^\mu - \tilde{X}_{\text{Re}}^0 \bar{H}^{0\mu} + \tilde{X}_{\text{Re}}^\mu \omega - \tilde{X}_{\text{Im}}^\mu \gamma \quad (\text{S3})$$

and

$$\tilde{B}_{\text{Im}}^\mu = \tilde{X}_{\text{Re}}^\mu \gamma - \tilde{X}_{\text{Im}}^0 \bar{H}^{0\mu} - \tilde{\sigma}_{\text{Im}}^\mu + \tilde{X}_{\text{Im}}^\mu \omega \quad (\text{S4})$$

for excitation level  $\mu$  ( $= 0$ , singles, doubles, etc.). Isolating the real and imaginary terms from the above equation gives

$$\tilde{X}_{\text{Re}}^{(n+1)} = \tilde{X}_{\text{Re}}^{(n)} + \frac{\tilde{B}_{\text{Re}}^{(n)} (\bar{H} - E_0 - \omega)^D + \tilde{B}_{\text{Im}}^{(n)} \gamma}{(\bar{H}^D - E_0 - \omega)^2 + \gamma^2} \quad (\text{S5})$$

and

$$\tilde{X}_{\text{Im}}^{(n+1)} = \tilde{X}_{\text{Im}}^{(n)} + \frac{\tilde{B}_{\text{Re}}^{(n)} \gamma - \tilde{B}_{\text{Im}}^{(n)} (\bar{H} - E_0 - \omega)^D}{(\bar{H}^D - E_0 - \omega)^2 + \gamma^2} \quad (\text{S6})$$

For  $\mu = 0$ ,

$$\tilde{X}_{\text{Re}}^0 = -\frac{\tilde{D}^0}{\omega \left(1 + \left(\frac{\gamma}{\omega}\right)^2\right)} \quad (\text{S7})$$

and

$$\tilde{X}_{\text{Im}}^0 = -\tilde{X}_{\text{Re}}^0 \left(\frac{\gamma}{\omega}\right). \quad (\text{S8})$$

## 1.2. Iterative scheme for right response

For the right response equation given by [note that RHS in the equation below is different from RHS of Eq. (22) in the paper]

$$(\bar{H} - E_0 - (\omega + i\gamma)) (X_{\text{Re}} + iX_{\text{Im}}) = D, \quad (\text{S9})$$

the corresponding iterative step is given by

$$\begin{aligned} & \left( X_{\text{Re}}^{(n+1)} + iX_{\text{Im}}^{(n+1)} \right) \\ &= \left( X_{\text{Re}}^{(n)} + iX_{\text{Im}}^{(n)} \right) + \frac{D - (\bar{H} - E_0 - (\omega + i\gamma)) \left( X_{\text{Re}}^{(n)} + iX_{\text{Im}}^{(n)} \right)}{(\bar{H} - E_0 - (\omega + i\gamma))^D} \\ &= \left( X_{\text{Re}}^{(n)} + iX_{\text{Im}}^{(n)} \right) + \frac{(\bar{H} - E_0 - \omega + i\gamma)^D \left( D - (\bar{H} - E_0 - (\omega + i\gamma)) \left( X_{\text{Re}}^{(n)} + iX_{\text{Im}}^{(n)} \right) \right)}{(\bar{H}^D - E_0 - \omega)^2 + \gamma^2} \\ &= \left( X_{\text{Re}}^{(n)} + iX_{\text{Im}}^{(n)} \right) + \frac{(\bar{H} - E_0 - \omega + i\gamma)^D \left( B_{\text{Re}}^{(n)} - iB_{\text{Im}}^{(n)} \right)}{(\bar{H}^D - E_0 - \omega)^2 + \gamma^2}, \end{aligned} \quad (\text{S10})$$

where  $B_{\text{Re}}$  and  $B_{\text{Im}}$  are the residuals given by

$$B_{\text{Re}}^\mu = D^\mu - \sigma_{\text{Re}}^\mu + \omega X_{\text{Re}}^\mu - \gamma X_{\text{Im}}^\mu \quad (\text{S11})$$

and

$$B_{\text{Im}}^\mu = -\gamma X_{\text{Re}}^\mu + \sigma_{\text{Im}}^\mu - \omega X_{\text{Im}}^\mu. \quad (\text{S12})$$

Isolating the real and imaginary terms from the above equation gives

$$X_{\text{Re}}^{(n+1)} = X_{\text{Re}}^{(n)} + \frac{(\bar{H} - E_0 - \omega)^D B_{\text{Re}} + \gamma B_{\text{Im}}}{(\bar{H}^D - E_0 - \omega)^2 + \gamma^2} \quad (\text{S13})$$

and

$$X_{\text{Im}}^{(n+1)} = X_{\text{Im}}^{(n)} + \frac{\gamma B_{\text{Re}} - (\bar{H} - E_0 - \omega)^D B_{\text{Im}}}{(\bar{H}^D - E_0 - \omega)^2 + \gamma^2}. \quad (\text{S14})$$

Finally, for  $\mu = 0$ ,

$$X_{\text{Re}}^0 = \frac{-D^0 + \bar{H}^{0\mu} X_{\text{Re}}^\mu + \frac{\gamma}{\omega} \bar{H}^{0\mu} X_{\text{Im}}^\mu}{\omega \left(1 + \left(\frac{\gamma}{\omega}\right)^2\right)} \quad (\text{S15})$$

and

$$X_{\text{Im}}^0 = \frac{-\gamma X_{\text{Re}}^0 + \bar{H}^{0\mu} X_{\text{Im}}^\mu}{\omega}. \quad (\text{S16})$$

**2. VALIDATION OF THE ANALYTICAL FC-CVS-EOM-EE-CCSD DAMPED  
RESPONSE APPROACH FOR RIXS MOMENTS WITH NUMERICAL  
SUM-OVER-STATE CALCULATIONS**

System: LiH (bond length = 1.6 Å)

Computational details: STO-3G basis set with frozen-core approximation

Symmetry group imposed =  $C_{2v}$

Initial state =  $1A_1$  (CCSD)

Final state =  $2A_1$  (excitation energy = 3.6295 eV)

Incident photon frequency = 2.12430931 a.u. (resonant with excitation energy of the  $1B_2$  state in Q-Chem symmetry notation)

Emitted photon frequency = 1.99092715 a.u.

TABLE S1: Comparison of analytical and numerical RIXS moments (all values in a.u.)

| $\gamma$ | RIXS moments                                      | Analytical |           | Numerical |           | % differences |      |
|----------|---------------------------------------------------|------------|-----------|-----------|-----------|---------------|------|
|          |                                                   | Re         | Im        | Re        | Im        | Re            | Im   |
| 0.005    | $M_{xx}^{f\leftarrow 0} / M_{yy}^{f\leftarrow 0}$ | -0.023583  | 0.801039  | -0.023526 | 0.801052  | 0.2           | -0.0 |
|          | $M_{zz}^{f\leftarrow 0}$                          | -0.289587  | 0.022319  | -0.284753 | 0.022095  | 1.7           | 1.0  |
|          | $M_{xx}^{0\leftarrow f} / M_{yy}^{0\leftarrow f}$ | -0.005944  | 0.218572  | -0.005941 | 0.216755  | 0.1           | 0.8  |
|          | $M_{zz}^{0\leftarrow f}$                          | -0.253951  | -0.019780 | -0.253735 | -0.019769 | 0.1           | 0.1  |
| 0.5      | $M_{xx}^{f\leftarrow 0} / M_{yy}^{f\leftarrow 0}$ | -0.002387  | 0.000857  | -0.002379 | 0.000874  | 0.3           | -1.9 |
|          | $M_{zz}^{f\leftarrow 0}$                          | 0.001909   | 0.044622  | 0.002012  | 0.044452  | -5.1          | 0.4  |
|          | $M_{xx}^{0\leftarrow f} / M_{yy}^{0\leftarrow f}$ | -0.000953  | 0.003688  | -0.000951 | 0.003670  | 0.2           | 0.5  |
|          | $M_{zz}^{0\leftarrow f}$                          | 0.001625   | -0.039605 | 0.001662  | -0.039616 | -2.2          | -0.0 |

The maximum difference of 5 % is for the real part of  $M_{zz}^{f\leftarrow 0}$  with  $\gamma=0.5$ , although the base numbers are small in magnitude. The slightly larger differences are due to the accumulation of numerical noise during the addition of 9 and 15 terms in the sum-over-state expressions of the  $xx/yy$  and  $zz$  components.

### 3. WATER

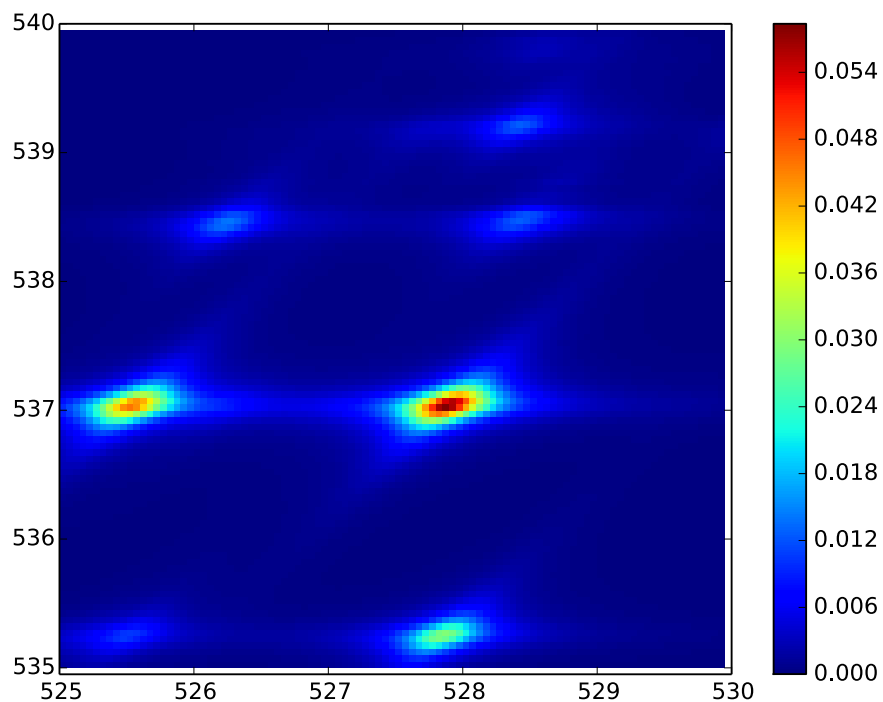

FIG. S1: Computed RIXS spectrum for water,

#### 3.1. Basis set used for water

```

H      0
S      3  1.00
        33.8650000      0.0254938
         5.0947900      0.1903730
         1.1587900      0.8521610
S      1  1.00
        0.3258400      1.0000000
S      1  1.00
        0.1027410      1.0000000
S      1  1.00
        0.0360000      1.0000000
P      1  1.00
        0.7500000      1.0000000
****
O      0
S      6  1.00
        8588.5000000     0.00189515
        1297.2300000     0.0143859

```

|    |              |              |           |
|----|--------------|--------------|-----------|
|    | 299.2960000  | 0.0707320    |           |
|    | 87.3771000   | 0.2400010    |           |
|    | 25.6789000   | 0.5947970    |           |
|    | 3.7400400    | 0.2808020    |           |
| SP | 3 1.00       |              |           |
|    | 42.1175000   | 0.1138890    | 0.0365114 |
|    | 9.6283700    | 0.9208110    | 0.2371530 |
|    | 2.8533200    | -0.00327447  | 0.8197020 |
| SP | 1 1.00       |              |           |
|    | 0.9056610    | 1.0000000    | 1.0000000 |
| SP | 1 1.00       |              |           |
|    | 0.2556110    | 1.0000000    | 1.0000000 |
| SP | 1 1.00       |              |           |
|    | 0.0845000    | 1.0000000    | 1.0000000 |
| D  | 1 1.00       |              |           |
|    | 1.2920000    | 1.0000000    |           |
| S  | 1 1.00       |              |           |
|    | 0.0058583805 | 1.0000000000 |           |
| S  | 1 1.00       |              |           |
|    | 0.0033459739 | 1.0000000000 |           |
| S  | 1 1.00       |              |           |
|    | 0.0020484225 | 1.0000000000 |           |
| P  | 1 1.00       |              |           |
|    | 0.0099882106 | 1.0000000000 |           |
| P  | 1 1.00       |              |           |
|    | 0.0056893607 | 1.0000000000 |           |
| P  | 1 1.00       |              |           |
|    | 0.0034756797 | 1.0000000000 |           |

## 4. BENZENE AND ITS CATION

## 4.1. Geometries

**Benzene: Ground state**

|   |               |               |              |
|---|---------------|---------------|--------------|
| H | 2.4750347531  | 0.0000000000  | 0.0000000000 |
| C | 1.3935929418  | 0.0000000000  | 0.0000000000 |
| C | 0.6967964709  | 1.2068868901  | 0.0000000000 |
| H | 1.2375173766  | 2.1434429715  | 0.0000000000 |
| C | -0.6967964709 | 1.2068868901  | 0.0000000000 |
| H | -1.2375173766 | 2.1434429715  | 0.0000000000 |
| C | -1.3935929418 | 0.0000000000  | 0.0000000000 |
| H | -2.4750347531 | 0.0000000000  | 0.0000000000 |
| C | -0.6967964709 | -1.2068868901 | 0.0000000000 |
| H | -1.2375173766 | -2.1434429715 | 0.0000000000 |
| C | 0.6967964709  | -1.2068868901 | 0.0000000000 |
| H | 1.2375173766  | -2.1434429715 | 0.0000000000 |

Nuclear Repulsion Energy = 203.71874490 hartrees

**Benzene cation: B<sub>3g</sub> relaxed**

|   |               |               |              |
|---|---------------|---------------|--------------|
| H | 1.2392908131  | -2.1390691708 | 0.0000000000 |
| C | 0.7225974533  | -1.1894682957 | 0.0000000000 |
| C | -0.7225974533 | -1.1894682957 | 0.0000000000 |
| H | -1.2392908131 | -2.1390691708 | 0.0000000000 |
| C | -1.4341864916 | 0.0000000000  | 0.0000000000 |
| H | -2.5128824541 | 0.0000000000  | 0.0000000000 |
| C | -0.7225974533 | 1.1894682957  | 0.0000000000 |
| H | -1.2392908131 | 2.1390691708  | 0.0000000000 |
| C | 0.7225974533  | 1.1894682957  | 0.0000000000 |
| H | 1.2392908131  | 2.1390691708  | 0.0000000000 |
| C | 1.4341864916  | 0.0000000000  | 0.0000000000 |
| H | 2.5128824541  | 0.0000000000  | 0.0000000000 |

Nuclear Repulsion Energy = 202.30075690 hartrees

FIG. S2: Geometric parameters and orientation of the optimized benzene cation structure ( ${}^2B_{3g}$ )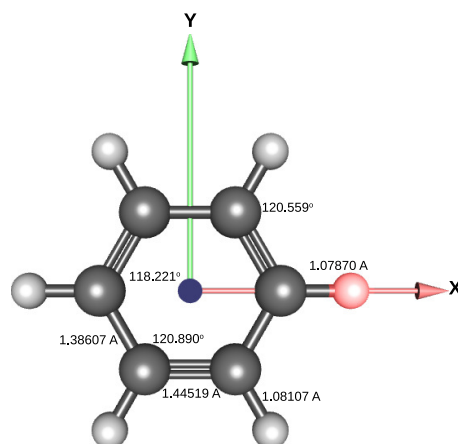



## 4.2. Benzene: Core and valence ionization energies

TABLE S2: Benzene: Valence and core ionization energies (eV) using EOM-IP-CCSD and CVS-EOM-IP-CCSD with 6-311(2+,+)G\*\*(uC)

| State                         | MO                | IE      |
|-------------------------------|-------------------|---------|
| c2 ${}^2A_g$                  | $1a_g$            | 290.992 |
| c1 ${}^2B_{2u}/c1 {}^2B_{3u}$ | $1b_{2u}/1b_{3u}$ | 290.975 |
| c1 ${}^2B_{1g}/c1 {}^2A_g$    | $1b_{1g}/2a_g$    | 290.934 |
| c1 ${}^2B_{3u}$               | $2b_{3u}$         | 290.914 |
| 4 ${}^2A_g$                   | $3a_g$            | 22.963  |
| 3 ${}^2B_{2u}/3 {}^2B_{3u}$   | $2b_{2u}/3b_{3u}$ | 21.000  |
| 2 ${}^2B_{1g}/3 {}^2A_g$      | $2b_{1g}/4a_g$    | 19.598  |
| 2 ${}^2A_g$                   | $5a_g$            | 17.365  |
| 2 ${}^2B_{3u}$                | $4b_{3u}$         | 15.818  |
| 2 ${}^2B_{2u}$                | $3b_{2u}$         | 14.802  |
| 1 ${}^2B_{2u}/1 {}^2B_{3u}$   | $4b_{2u}/5b_{3u}$ | 14.402  |
| 1 ${}^2B_{1u}$                | $1b_{1u}$         | 12.547  |
| 1 ${}^2B_{1g}/1 {}^2A_g$      | $3b_{1g}/6a_g$    | 12.108  |
| 1 ${}^2B_{2g}/1 {}^2B_{3g}$   | $1b_{2g}/1b_{3g}$ | 9.224   |

Note that the numbering of MOs is opposite from the numbering of the EOM-IP states.

'c' denotes core states.

### 4.3. Benzene: XAS energies and oscillator strengths

TABLE S3: Benzene: fc-CVS-EOMEE-CCSD/6-311(2+,+)G\*\*(uC) excitation energies  $\omega_i$  (eV) and oscillator strengths  $f$ . Only bright transitions are shown.

| Symm.                                  | $\omega_i$ | $f$     | Assignment |
|----------------------------------------|------------|---------|------------|
| c2B <sub>1u</sub>                      | 285.97     | 0.30677 | (A)        |
| c1B <sub>2u</sub> /c2B <sub>3u</sub>   | 287.80     | 0.04405 | (B)        |
| c3B <sub>2u</sub> /c4B <sub>3u</sub>   | 288.79     | 0.00355 | (C1)       |
| c4B <sub>2u</sub> /c5B <sub>3u</sub>   | 288.83     | 0.01005 | (C2)       |
| c5B <sub>1u</sub>                      | 288.91     | 0.00543 | (C3)       |
| c5B <sub>2u</sub> /c7B <sub>3u</sub>   | 289.35     | 0.00324 |            |
| c6B <sub>2u</sub> /c8B <sub>3u</sub>   | 289.40     | 0.00246 |            |
| c7B <sub>2u</sub> /c10B <sub>3u</sub>  | 289.46     | 0.00027 |            |
| c8B <sub>1u</sub>                      | 289.66     | 0.00270 |            |
| c9B <sub>2u</sub> /c12B <sub>3u</sub>  | 289.75     | 0.02059 | (D)        |
| c10B <sub>2u</sub> /c13B <sub>3u</sub> | 290.12     | 0.00120 |            |
| c11B <sub>2u</sub> /c14B <sub>3u</sub> | 290.14     | 0.00037 |            |
| c14B <sub>2u</sub> /c16B <sub>3u</sub> | 290.21     | 0.00001 |            |
| c9B <sub>1u</sub>                      | 290.28     | 0.00270 |            |
| c12B <sub>1u</sub>                     | 290.83     | 0.00067 |            |
| c15B <sub>1u</sub>                     | 291.07     | 0.02991 |            |

## 4.4. Benzene: XAS NTOs

TABLE S4: Benzene: fc-CVS-EOM-CCSD/6-311(2+,+)G\*\*(uC). NTOs of the relevant core excited states. NTO isosurface is 0.005.

| Excitation   | Hole | $\sigma_K^2$ | Particle |
|--------------|------|--------------|----------|
| (A) $B_{1u}$ |      | 0.35         |          |
|              |      | 0.35         |          |
| (B) $B_{2u}$ |      | 0.50         |          |
|              |      | 0.20         |          |
| (B) $B_{3u}$ |      | 0.50         |          |
|              |      | 0.20         |          |

|               |                                                                                     |      |                                                                                       |
|---------------|-------------------------------------------------------------------------------------|------|---------------------------------------------------------------------------------------|
| (C1) $B_{2u}$ | 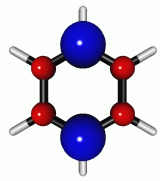   | 0.33 |    |
|               |    | 0.23 |    |
| (C1) $B_{3u}$ |    | 0.33 |    |
|               |   | 0.24 |   |
| (C2) $B_{2u}$ |  | 0.38 |  |
|               |  | 0.35 |  |
| (C2) $B_{3u}$ |  | 0.38 |  |
|               |  | 0.35 |  |

|               |                                                                                     |      |                                                                                       |
|---------------|-------------------------------------------------------------------------------------|------|---------------------------------------------------------------------------------------|
| (C3) $B_{1u}$ | 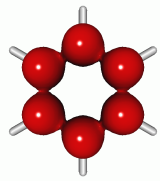   | 0.69 |    |
| (D) $B_{2u}$  |    | 0.46 |    |
|               |    | 0.19 |    |
| (D) $B_{3u}$  |   | 0.45 |   |
|               |  | 0.20 |  |

#### 4.5. Benzene: XES energies, oscillator strengths, and NTOs

TABLE S5: Benzene: Relevant oscillator strengths, emitted photon frequencies (eV) and NTOs between fc-CVS-EOMIP-CCSD states (with core holes corresponding to XAS peaks A and B) and EOM-IP-CCSD states with 6-311(2+,+)G\*\*(uC) basis. NTO isosurface is 0.05.  $c$  denotes a core-ionized state. See Table S2 for states-to-orbitals mapping.

| Transition                     | $\omega_e$ | Orb. trans.                   | $f$ (a.u.) | Particle NTO                                                                         | $\sigma_K^2$ | Core-hole NTO                                                                         |
|--------------------------------|------------|-------------------------------|------------|--------------------------------------------------------------------------------------|--------------|---------------------------------------------------------------------------------------|
| $1B_{2u} \rightarrow c1A_g$    | 276.5323   | $4b_{2u} \rightarrow 2a_g$    | 0.019835   | 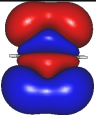   | 0.82         |    |
| $1B_{2u} \rightarrow c1B_{1g}$ | 276.5323   | $4b_{2u} \rightarrow 1b_{1g}$ | 0.019835   |    | 0.84         |    |
| $1B_{3u} \rightarrow c1A_g$    | 276.5323   | $5b_{3u} \rightarrow 2a_g$    | 0.019835   |   | 0.84         |   |
| $1B_{3u} \rightarrow c1B_{1g}$ | 276.5323   | $5b_{3u} \rightarrow 1b_{1g}$ | 0.019835   |  | 0.82         |  |
| $2B_{2u} \rightarrow c1A_g$    | 276.1319   | $3b_{2u} \rightarrow 2a_g$    | 0.040857   |  | 0.83         |  |
| $2B_{2u} \rightarrow c1B_{1g}$ | 276.1319   | $3b_{2u} \rightarrow 1b_{1g}$ | 0.040857   |  | 0.83         |  |
| $2B_{3u} \rightarrow c1A_g$    | 275.1160   | $4b_{3u} \rightarrow 2a_g$    | 0.008829   |  | 0.80         |  |
| $2B_{3u} \rightarrow c1B_{1g}$ | 275.1160   | $4b_{3u} \rightarrow 1b_{1g}$ | 0.008829   |  | 0.80         |  |
| $1A_g \rightarrow c1B_{2u}$    | 278.8670   | $6a_g \rightarrow 1b_{2u}$    | 0.000311   |  | 0.85         |  |
| $1A_g \rightarrow c2B_{3u}$    | 278.8670   | $6a_g \rightarrow 1b_{3u}$    | 0.000311   |  | 0.85         |  |

|                                |          |                               |          |                                                                                      |      |                                                                                       |
|--------------------------------|----------|-------------------------------|----------|--------------------------------------------------------------------------------------|------|---------------------------------------------------------------------------------------|
| $1B_{1g} \rightarrow c1B_{2u}$ | 278.8670 | $3b_{1g} \rightarrow 1b_{2u}$ | 0.000311 | 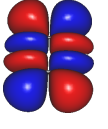   | 0.85 |    |
| $1B_{1g} \rightarrow c2B_{3u}$ | 278.8670 | $3b_{1g} \rightarrow 1b_{3u}$ | 0.000311 |    | 0.85 |    |
| $2A_g \rightarrow c1B_{2u}$    | 273.6100 | $5a_g \rightarrow 1b_{2u}$    | 0.021223 |    | 0.79 |    |
| $2A_g \rightarrow c2B_{3u}$    | 273.6100 | $5a_g \rightarrow 1b_{3u}$    | 0.021223 |    | 0.79 |    |
| $3A_g \rightarrow c1B_{2u}$    | 271.3764 | $4a_g \rightarrow 1b_{2u}$    | 0.009497 |    | 0.76 |    |
| $3A_g \rightarrow c2B_{3u}$    | 271.3764 | $4a_g \rightarrow 1b_{3u}$    | 0.009497 |   | 0.76 |   |
| $2B_{1g} \rightarrow c1B_{2u}$ | 271.3764 | $2b_{1g} \rightarrow 1b_{2u}$ | 0.009497 |  | 0.76 |  |
| $2B_{1g} \rightarrow c2B_{3u}$ | 271.3764 | $2b_{1g} \rightarrow 1b_{3u}$ | 0.009497 |  | 0.76 |  |
| $1B_{2g} \rightarrow c2B_{3u}$ | 281.7503 | $1b_{2g} \rightarrow 1b_{3u}$ | 0.067681 |  | 0.89 |  |
| $1B_{3g} \rightarrow c1B_{2u}$ | 281.7503 | $1b_{3g} \rightarrow 1b_{2u}$ | 0.067683 |  | 0.89 |  |
| $1B_{1u} \rightarrow c2A_g$    | 278.4453 | $1b_{1u} \rightarrow 1a_g$    | 0.051099 |  | 0.81 |  |
| $1B_{2u} \rightarrow c2A_g$    | 276.5907 | $4b_{2u} \rightarrow 1a_g$    | 0.012181 |  | 0.83 |  |
| $1B_{3u} \rightarrow c2A_g$    | 276.5907 | $5b_{3u} \rightarrow 1a_g$    | 0.012181 |  | 0.83 |  |

#### 4.6. Benzene: RIXS cross sections

TABLE S6: Benzene: fc-CVS-EOMEE-CCSD/6-311(2+,+)G\*\*(uC) valence excitation energies  $\Omega_{f0}$  (eV) of gerade states and their RIXS cross sections (a.u.) for  $\theta=0^\circ, 45^\circ, 90^\circ$ .

| Final state      | $\Omega_{f0}$ | $\omega_i = 285.97$ eV   |                           |                           | $\omega_i = 287.80$ eV   |                           |                           |
|------------------|---------------|--------------------------|---------------------------|---------------------------|--------------------------|---------------------------|---------------------------|
|                  |               | $\sigma^{RIXS}(0^\circ)$ | $\sigma^{RIXS}(45^\circ)$ | $\sigma^{RIXS}(90^\circ)$ | $\sigma^{RIXS}(0^\circ)$ | $\sigma^{RIXS}(45^\circ)$ | $\sigma^{RIXS}(90^\circ)$ |
| 1A <sub>g</sub>  | 0.00          | 1.271070                 | 1.938659                  | 2.606247                  | 0.038017                 | 0.061142                  | 0.084266                  |
| 2A <sub>g</sub>  | 7.86          | 0.000000                 | 0.000000                  | 0.000000                  | 0.000000                 | 0.000000                  | 0.000000                  |
| 3A <sub>g</sub>  | 7.88          | 0.000419                 | 0.000619                  | 0.000818                  | 0.000065                 | 0.000083                  | 0.000102                  |
| 4A <sub>g</sub>  | 9.10          | 0.000000                 | 0.000000                  | 0.000000                  | 0.000001                 | 0.000001                  | 0.000001                  |
| 5A <sub>g</sub>  | 9.23          | 0.000000                 | 0.000000                  | 0.000001                  | 0.000020                 | 0.000022                  | 0.000024                  |
| 6A <sub>g</sub>  | 9.32          | 0.000000                 | 0.000000                  | 0.000000                  | 0.000036                 | 0.000039                  | 0.000042                  |
| 7A <sub>g</sub>  | 10.06         | 0.000000                 | 0.000000                  | 0.000000                  | 0.000001                 | 0.000001                  | 0.000001                  |
| 8A <sub>g</sub>  | 10.13         | 0.000985                 | 0.001405                  | 0.001825                  | 0.000344                 | 0.000673                  | 0.001001                  |
| 9A <sub>g</sub>  | 10.42         | 0.000042                 | 0.000045                  | 0.000049                  | 0.001100                 | 0.001192                  | 0.001284                  |
| 10A <sub>g</sub> | 10.54         | 0.000000                 | 0.000016                  | 0.000033                  | 0.000211                 | 0.000600                  | 0.000990                  |
| 11A <sub>g</sub> | 10.54         | 0.000009                 | 0.000010                  | 0.000011                  | 0.000186                 | 0.000202                  | 0.000217                  |
| 12A <sub>g</sub> | 10.58         | 0.000047                 | 0.000071                  | 0.000095                  | 0.000025                 | 0.000054                  | 0.000084                  |
| 13A <sub>g</sub> | 10.67         | 0.000000                 | 0.000000                  | 0.000000                  | 0.000004                 | 0.000004                  | 0.000004                  |
| 14A <sub>g</sub> | 11.15         | 0.000000                 | 0.000000                  | 0.000000                  | 0.000000                 | 0.000000                  | 0.000001                  |
| 15A <sub>g</sub> | 11.70         | 0.000016                 | 0.000017                  | 0.000018                  | 0.000246                 | 0.000266                  | 0.000287                  |
| 16A <sub>g</sub> | 11.74         | 0.000026                 | 0.000041                  | 0.000057                  | 0.000148                 | 0.000412                  | 0.000676                  |
| 17A <sub>g</sub> | 11.91         | 0.000000                 | 0.000000                  | 0.000000                  | 0.000008                 | 0.000008                  | 0.000009                  |
| 18A <sub>g</sub> | 12.03         | 0.000029                 | 0.000031                  | 0.000034                  | 0.000403                 | 0.000437                  | 0.000470                  |
| 19A <sub>g</sub> | 12.06         | 0.000071                 | 0.000106                  | 0.000140                  | 0.000212                 | 0.000584                  | 0.000956                  |
| 20A <sub>g</sub> | 12.24         | 0.000021                 | 0.000022                  | 0.000024                  | 0.000975                 | 0.001056                  | 0.001138                  |
| 21A <sub>g</sub> | 12.25         | 0.000079                 | 0.000128                  | 0.000177                  | 0.001827                 | 0.004988                  | 0.008149                  |
| 1B <sub>1g</sub> | 7.86          | 0.000000                 | 0.000000                  | 0.000000                  | 0.000000                 | 0.000000                  | 0.000000                  |
| 2B <sub>1g</sub> | 7.91          | 0.000000                 | 0.000000                  | 0.000000                  | 0.000000                 | 0.000000                  | 0.000000                  |
| 3B <sub>1g</sub> | 9.10          | 0.000000                 | 0.000000                  | 0.000000                  | 0.000001                 | 0.000001                  | 0.000001                  |



|                   |       |          |          |          |          |          |          |
|-------------------|-------|----------|----------|----------|----------|----------|----------|
| 4B <sub>1g</sub>  | 9.23  | 0.000000 | 0.000000 | 0.000001 | 0.000020 | 0.000022 | 0.000024 |
| 5B <sub>1g</sub>  | 9.32  | 0.000000 | 0.000000 | 0.000000 | 0.000036 | 0.000039 | 0.000042 |
| 6B <sub>1g</sub>  | 10.06 | 0.000000 | 0.000000 | 0.000000 | 0.000001 | 0.000001 | 0.000001 |
| 7B <sub>1g</sub>  | 10.17 | 0.000000 | 0.000000 | 0.000000 | 0.000000 | 0.000000 | 0.000000 |
| 8B <sub>1g</sub>  | 10.42 | 0.000042 | 0.000045 | 0.000049 | 0.001101 | 0.001193 | 0.001284 |
| 9B <sub>1g</sub>  | 10.43 | 0.000067 | 0.000050 | 0.000033 | 0.001592 | 0.001194 | 0.000796 |
| 10B <sub>1g</sub> | 10.54 | 0.000009 | 0.000010 | 0.000011 | 0.000186 | 0.000201 | 0.000217 |
| 11B <sub>1g</sub> | 10.67 | 0.000000 | 0.000000 | 0.000000 | 0.000004 | 0.000004 | 0.000004 |
| 12B <sub>1g</sub> | 11.15 | 0.000000 | 0.000000 | 0.000000 | 0.000000 | 0.000000 | 0.000001 |
| 13B <sub>1g</sub> | 11.67 | 0.000017 | 0.000013 | 0.000008 | 0.000222 | 0.000166 | 0.000111 |
| 14B <sub>1g</sub> | 11.70 | 0.000016 | 0.000017 | 0.000018 | 0.000246 | 0.000266 | 0.000287 |
| 15B <sub>1g</sub> | 11.91 | 0.000000 | 0.000000 | 0.000000 | 0.000008 | 0.000008 | 0.000009 |
| 16B <sub>1g</sub> | 12.03 | 0.000029 | 0.000031 | 0.000034 | 0.000403 | 0.000436 | 0.000470 |
| 17B <sub>1g</sub> | 12.04 | 0.000026 | 0.000019 | 0.000013 | 0.000246 | 0.000185 | 0.000123 |
| 18B <sub>1g</sub> | 12.24 | 0.000021 | 0.000022 | 0.000024 | 0.000974 | 0.001055 | 0.001136 |
| 19B <sub>1g</sub> | 12.37 | 0.000004 | 0.000003 | 0.000002 | 0.000473 | 0.000355 | 0.000236 |
| 20B <sub>1g</sub> | 12.59 | 0.000014 | 0.000015 | 0.000016 | 0.000459 | 0.000497 | 0.000535 |
| 1B <sub>2g</sub>  | 6.45  | 0.000203 | 0.000178 | 0.000153 | 0.020316 | 0.017777 | 0.015238 |
| 2B <sub>2g</sub>  | 7.57  | 0.000179 | 0.000153 | 0.000127 | 0.001242 | 0.001090 | 0.000938 |
| 3B <sub>2g</sub>  | 7.64  | 0.000000 | 0.000000 | 0.000000 | 0.000000 | 0.000000 | 0.000000 |
| 4B <sub>2g</sub>  | 7.65  | 0.000005 | 0.000005 | 0.000004 | 0.000097 | 0.000085 | 0.000073 |
| 5B <sub>2g</sub>  | 8.29  | 0.000092 | 0.000079 | 0.000066 | 0.000538 | 0.000473 | 0.000409 |
| 6B <sub>2g</sub>  | 8.87  | 0.000016 | 0.000013 | 0.000011 | 0.000096 | 0.000084 | 0.000072 |
| 7B <sub>2g</sub>  | 8.88  | 0.000000 | 0.000000 | 0.000000 | 0.000000 | 0.000000 | 0.000000 |
| 8B <sub>2g</sub>  | 9.18  | 0.000000 | 0.000000 | 0.000000 | 0.000000 | 0.000000 | 0.000000 |
| 9B <sub>2g</sub>  | 9.19  | 0.000054 | 0.000046 | 0.000039 | 0.000091 | 0.000079 | 0.000068 |
| 10B <sub>2g</sub> | 9.60  | 0.001500 | 0.001308 | 0.001116 | 0.000113 | 0.000110 | 0.000106 |
| 11B <sub>2g</sub> | 10.43 | 0.000249 | 0.000213 | 0.000177 | 0.002641 | 0.002309 | 0.001977 |
| 12B <sub>2g</sub> | 10.57 | 0.000000 | 0.000000 | 0.000000 | 0.000000 | 0.000000 | 0.000000 |
| 13B <sub>2g</sub> | 10.67 | 0.260048 | 0.227553 | 0.195058 | 0.005970 | 0.005224 | 0.004478 |



TABLE S7: Benzene: fc-CVS-EOMEE-CCSD/6-311(2+,+)G\*\*(uC) valence excitation energies  $\Omega_{f0}$  (eV) of gerade states and their RIXS cross sections (a.u.) for  $\theta=0^\circ, 45^\circ, 90^\circ$ .

| Final state      | $\Omega_{f0}$ | $\omega_i = 288.79$ eV   |                           |                           | $\omega_i = 288.83$ eV   |                           |                           |
|------------------|---------------|--------------------------|---------------------------|---------------------------|--------------------------|---------------------------|---------------------------|
|                  |               | $\sigma^{RIXS}(0^\circ)$ | $\sigma^{RIXS}(45^\circ)$ | $\sigma^{RIXS}(90^\circ)$ | $\sigma^{RIXS}(0^\circ)$ | $\sigma^{RIXS}(45^\circ)$ | $\sigma^{RIXS}(90^\circ)$ |
| 1A <sub>g</sub>  | 0.00          | 0.012223                 | 0.027252                  | 0.042281                  | 0.011861                 | 0.026960                  | 0.042060                  |
| 2A <sub>g</sub>  | 7.86          | 0.000000                 | 0.000000                  | 0.000000                  | 0.000000                 | 0.000000                  | 0.000000                  |
| 3A <sub>g</sub>  | 7.88          | 0.000867                 | 0.001220                  | 0.001572                  | 0.000960                 | 0.001351                  | 0.001741                  |
| 4A <sub>g</sub>  | 9.10          | 0.000000                 | 0.000000                  | 0.000000                  | 0.000000                 | 0.000000                  | 0.000000                  |
| 5A <sub>g</sub>  | 9.23          | 0.000002                 | 0.000003                  | 0.000003                  | 0.000003                 | 0.000003                  | 0.000003                  |
| 6A <sub>g</sub>  | 9.32          | 0.000081                 | 0.000088                  | 0.000094                  | 0.000074                 | 0.000080                  | 0.000086                  |
| 7A <sub>g</sub>  | 10.06         | 0.000000                 | 0.000000                  | 0.000000                  | 0.000000                 | 0.000000                  | 0.000000                  |
| 8A <sub>g</sub>  | 10.13         | 0.000766                 | 0.000947                  | 0.001128                  | 0.000807                 | 0.000991                  | 0.001175                  |
| 9A <sub>g</sub>  | 10.42         | 0.000759                 | 0.000822                  | 0.000885                  | 0.000806                 | 0.000873                  | 0.000940                  |
| 10A <sub>g</sub> | 10.54         | 0.000332                 | 0.000679                  | 0.001026                  | 0.000380                 | 0.000740                  | 0.001100                  |
| 11A <sub>g</sub> | 10.54         | 0.000209                 | 0.000226                  | 0.000243                  | 0.000214                 | 0.000232                  | 0.000250                  |
| 12A <sub>g</sub> | 10.58         | 0.001322                 | 0.002247                  | 0.003172                  | 0.001562                 | 0.002651                  | 0.003740                  |
| 13A <sub>g</sub> | 10.67         | 0.000027                 | 0.000029                  | 0.000032                  | 0.000028                 | 0.000030                  | 0.000032                  |
| 14A <sub>g</sub> | 11.15         | 0.000006                 | 0.000007                  | 0.000007                  | 0.000007                 | 0.000007                  | 0.000008                  |
| 15A <sub>g</sub> | 11.70         | 0.000069                 | 0.000075                  | 0.000080                  | 0.000071                 | 0.000077                  | 0.000083                  |
| 16A <sub>g</sub> | 11.74         | 0.000029                 | 0.000106                  | 0.000183                  | 0.000031                 | 0.000113                  | 0.000196                  |
| 17A <sub>g</sub> | 11.91         | 0.000001                 | 0.000001                  | 0.000001                  | 0.000001                 | 0.000001                  | 0.000001                  |
| 18A <sub>g</sub> | 12.03         | 0.000122                 | 0.000132                  | 0.000142                  | 0.000119                 | 0.000129                  | 0.000138                  |
| 19A <sub>g</sub> | 12.06         | 0.000051                 | 0.000169                  | 0.000288                  | 0.000053                 | 0.000180                  | 0.000306                  |
| 20A <sub>g</sub> | 12.24         | 0.000275                 | 0.000297                  | 0.000320                  | 0.000304                 | 0.000330                  | 0.000355                  |
| 21A <sub>g</sub> | 12.25         | 0.000711                 | 0.001980                  | 0.003250                  | 0.000823                 | 0.002306                  | 0.003789                  |
| 1B <sub>1g</sub> | 7.86          | 0.000000                 | 0.000000                  | 0.000000                  | 0.000000                 | 0.000000                  | 0.000000                  |
| 2B <sub>1g</sub> | 7.91          | 0.000000                 | 0.000000                  | 0.000000                  | 0.000000                 | 0.000000                  | 0.000000                  |
| 3B <sub>1g</sub> | 9.10          | 0.000000                 | 0.000000                  | 0.000000                  | 0.000000                 | 0.000000                  | 0.000000                  |
| 4B <sub>1g</sub> | 9.23          | 0.000002                 | 0.000003                  | 0.000003                  | 0.000003                 | 0.000003                  | 0.000003                  |





TABLE S8: Benzene: fc-CVS-EOMEE-CCSD/6-311(2+,+)G\*\*(uC) valence excitation energies  $\Omega_{f0}$  (eV) of gerade states and their RIXS cross sections (a.u.) for  $\theta=0^\circ, 45^\circ, 90^\circ$ .

| Final state      | $\Omega_{f0}$ | $\omega_i = 288.91$ eV   |                           |                           | $\omega_i = 289.75$ eV   |                           |                           |
|------------------|---------------|--------------------------|---------------------------|---------------------------|--------------------------|---------------------------|---------------------------|
|                  |               | $\sigma^{RIXS}(0^\circ)$ | $\sigma^{RIXS}(45^\circ)$ | $\sigma^{RIXS}(90^\circ)$ | $\sigma^{RIXS}(0^\circ)$ | $\sigma^{RIXS}(45^\circ)$ | $\sigma^{RIXS}(90^\circ)$ |
| 1A <sub>g</sub>  | 0.00          | 0.011441                 | 0.025323                  | 0.039206                  | 0.005942                 | 0.020005                  | 0.034068                  |
| 2A <sub>g</sub>  | 7.86          | 0.000000                 | 0.000000                  | 0.000000                  | 0.000000                 | 0.000000                  | 0.000000                  |
| 3A <sub>g</sub>  | 7.88          | 0.000970                 | 0.001370                  | 0.001770                  | 0.000216                 | 0.000316                  | 0.000415                  |
| 4A <sub>g</sub>  | 9.10          | 0.000000                 | 0.000000                  | 0.000000                  | 0.000000                 | 0.000000                  | 0.000000                  |
| 5A <sub>g</sub>  | 9.23          | 0.000003                 | 0.000003                  | 0.000003                  | 0.000001                 | 0.000001                  | 0.000002                  |
| 6A <sub>g</sub>  | 9.32          | 0.000052                 | 0.000056                  | 0.000060                  | 0.000001                 | 0.000001                  | 0.000001                  |
| 7A <sub>g</sub>  | 10.06         | 0.000000                 | 0.000000                  | 0.000000                  | 0.000000                 | 0.000000                  | 0.000000                  |
| 8A <sub>g</sub>  | 10.13         | 0.000759                 | 0.000926                  | 0.001093                  | 0.000065                 | 0.000187                  | 0.000308                  |
| 9A <sub>g</sub>  | 10.42         | 0.000745                 | 0.000807                  | 0.000870                  | 0.000110                 | 0.000119                  | 0.000128                  |
| 10A <sub>g</sub> | 10.54         | 0.000420                 | 0.000734                  | 0.001049                  | 0.000202                 | 0.000244                  | 0.000286                  |
| 11A <sub>g</sub> | 10.54         | 0.000182                 | 0.000197                  | 0.000212                  | 0.000028                 | 0.000030                  | 0.000033                  |
| 12A <sub>g</sub> | 10.58         | 0.001970                 | 0.003305                  | 0.004639                  | 0.000561                 | 0.000935                  | 0.001309                  |
| 13A <sub>g</sub> | 10.67         | 0.000024                 | 0.000026                  | 0.000028                  | 0.000002                 | 0.000002                  | 0.000003                  |
| 14A <sub>g</sub> | 11.15         | 0.000006                 | 0.000007                  | 0.000007                  | 0.000005                 | 0.000005                  | 0.000005                  |
| 15A <sub>g</sub> | 11.70         | 0.000062                 | 0.000067                  | 0.000073                  | 0.000007                 | 0.000007                  | 0.000007                  |
| 16A <sub>g</sub> | 11.74         | 0.000028                 | 0.000109                  | 0.000190                  | 0.000008                 | 0.000025                  | 0.000042                  |
| 17A <sub>g</sub> | 11.91         | 0.000001                 | 0.000001                  | 0.000001                  | 0.000000                 | 0.000000                  | 0.000000                  |
| 18A <sub>g</sub> | 12.03         | 0.000093                 | 0.000101                  | 0.000109                  | 0.000000                 | 0.000000                  | 0.000000                  |
| 19A <sub>g</sub> | 12.06         | 0.000050                 | 0.000177                  | 0.000304                  | 0.000001                 | 0.000009                  | 0.000016                  |
| 20A <sub>g</sub> | 12.24         | 0.000350                 | 0.000379                  | 0.000408                  | 0.000065                 | 0.000070                  | 0.000076                  |
| 21A <sub>g</sub> | 12.25         | 0.000971                 | 0.002745                  | 0.004519                  | 0.000138                 | 0.000430                  | 0.000723                  |
| 1B <sub>1g</sub> | 7.86          | 0.000000                 | 0.000000                  | 0.000000                  | 0.000000                 | 0.000000                  | 0.000000                  |
| 2B <sub>1g</sub> | 7.91          | 0.000000                 | 0.000000                  | 0.000000                  | 0.000000                 | 0.000000                  | 0.000000                  |
| 3B <sub>1g</sub> | 9.10          | 0.000000                 | 0.000000                  | 0.000000                  | 0.000000                 | 0.000000                  | 0.000000                  |
| 4B <sub>1g</sub> | 9.23          | 0.000002                 | 0.000003                  | 0.000003                  | 0.000001                 | 0.000001                  | 0.000001                  |







## 4.7. Benzene: RIXS 2D maps

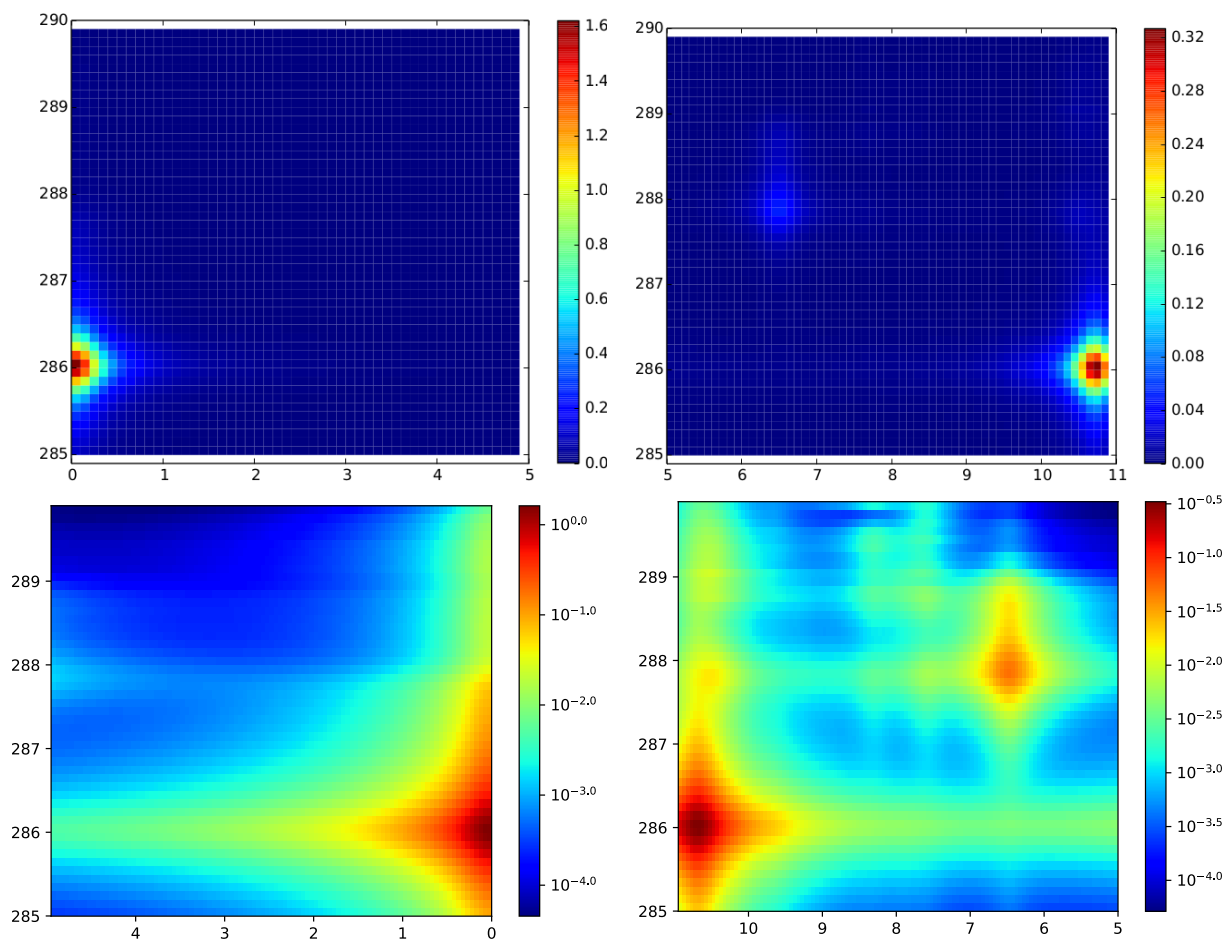

FIG. S3: Computed REXS (left) and RIXS (right) two-dimensional energy-loss ( $X$  axis) spectra; fc-CVS-EOM-CCSD/6-311(2+,+)G\*\*(uC). The bottom panels show the spectra on the logarithmic scale.

#### 4.8. Benzene cation: XAS energies and oscillator strengths

TABLE S9: Benzene cation ( ${}^2B_{3g}$ ): fc-CVS-EOMEE-CCSD/6-311(2+,+)G\*\*(uC) core excitation energies  $\omega_i$  (eV) and oscillator strengths  $f$  at the neutral unrelaxed and relaxed geometries.

| Unrelaxed $B_{3g}$ |            |         | Relaxed $B_{3g}$ |            |         | Assignment |
|--------------------|------------|---------|------------------|------------|---------|------------|
| Symm.              | $\omega_i$ | $f$     | Symm.            | $\omega_i$ | $f$     |            |
| $B_{1u}$           | 281.37     | 0.08192 | $B_{1u}$         | 281.67     | 0.08182 | (A)        |
| $B_{1u}$           | 285.01     | 0.02219 | $B_{1u}$         | 285.11     | 0.02229 | (B)        |
| $B_{1u}$           | 285.90     | 0.08098 | $B_{1u}$         | 285.79     | 0.08674 | (C)        |
| $B_{1u}$           | 286.35     | 0.09080 | $B_{1u}$         | 286.47     | 0.09145 | (D)        |
| $B_{1u}$           | 287.57     | 0.08782 | $B_{1u}$         | 287.53     | 0.08012 | (E)        |
| $B_{1u}$           | 288.43     | 0.00432 | $B_{1u}$         | 288.56     | 0.00713 |            |
| $B_{1u}$           | 288.88     | 0.00022 | $B_{1u}$         | 288.98     | 0.00014 |            |
| $B_{3u}$           | 289.23     | 0.00060 | $B_{3u}$         | 289.27     | 0.00057 |            |
| $B_{3u}$           | 289.67     | 0.01692 | $B_{3u}$         | 289.72     | 0.01668 |            |
| $B_{3u}$           | 290.09     | 0.00076 | $B_{3u}$         | 290.16     | 0.00071 |            |
| $B_{2u}$           | 290.11     | 0.00176 | $B_{2u}$         | 290.18     | 0.00179 |            |
| $B_{3u}$           | 290.51     | 0.00495 | $B_{3u}$         | 290.56     | 0.00500 |            |
| $B_{3u}$           | 290.62     | 0.01234 | $B_{3u}$         | 290.69     | 0.01102 |            |
| $B_{2u}$           | 290.65     | 0.03305 | $B_{2u}$         | 290.71     | 0.03350 |            |
| $B_{3u}$           | 290.75     | 0.00771 | $B_{3u}$         | 290.80     | 0.00744 |            |
| $B_{2u}$           | 291.02     | 0.00000 | $B_{2u}$         | 291.06     | 0.00007 |            |
| $B_{1u}$           | 291.09     | 0.00302 | $B_{1u}$         | 291.16     | 0.00275 |            |
| $B_{3u}$           | 291.20     | 0.00008 | $B_{3u}$         | 291.27     | 0.00006 |            |
| $B_{2u}$           | 291.23     | 0.00000 | $B_{2u}$         | 291.27     | 0.00007 |            |
| $B_{1u}$           | 291.32     | 0.00302 | $B_{1u}$         | 291.38     | 0.00254 |            |
| $B_{3u}$           | 291.47     | 0.00029 | $B_{3u}$         | 291.53     | 0.00018 |            |
| $B_{3u}$           | 291.52     | 0.00184 | $B_{3u}$         | 291.59     | 0.00183 |            |
| $B_{2u}$           | 291.55     | 0.00681 | $B_{2u}$         | 291.61     | 0.00662 |            |
| $B_{3u}$           | 291.72     | 0.00405 | $B_{2u}$         | 291.73     | 0.00189 |            |
| $B_{2u}$           | 291.76     | 0.00056 | $B_{3u}$         | 291.79     | 0.00425 |            |
| $B_{2u}$           | 291.76     | 0.01346 | $B_{2u}$         | 291.82     | 0.01257 |            |
| $B_{2u}$           | 292.00     | 0.00100 | $B_{2u}$         | 291.99     | 0.00116 |            |
| $B_{1u}$           | 292.04     | 0.00639 | $B_{1u}$         | 292.04     | 0.00611 |            |

## 4.9. Benzene cation: XAS NTOs

TABLE S10: Benzene cation ( $B_{3g}$ ): fc-CVS-EOM-CCSD/6-311(2+,+)G\*\*(uC) NTOs of the relevant core excited states.

| Excitation   | Hole                                                                                | $\sigma_K^2$ | Particle                                                                              |
|--------------|-------------------------------------------------------------------------------------|--------------|---------------------------------------------------------------------------------------|
| (A) $B_{1u}$ | 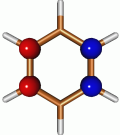   | 0.67         |    |
| (B) $B_{1u}$ |    | 0.58         |    |
| (C) $B_{1u}$ |    | 0.59         |    |
| (D) $B_{1u}$ |  | 0.77         |  |
| (E) $B_{1u}$ |  | 0.77         |  |

#### 4.10. Benzene cation: RIXS cross sections

TABLE S11: Benzene cation: fc-CVS-EOMEE-CCSD/6-311(2+,+)G\*\*(uC) valence excitation energies  $\Omega_{f_0}$  (eV) of gerade states and their RIXS cross sections (a.u.) for  $\theta=0^\circ$  for Frank-Condon and  $B_{3g}$  relaxed geometries with  $\omega_i$  equal to 281.37 eV and 281.67 eV, respectively.

| Trans-<br>-tion  | Unrelaxed geom. |                          |                           |                           | Relaxed geom.  |                          |                           |                           |
|------------------|-----------------|--------------------------|---------------------------|---------------------------|----------------|--------------------------|---------------------------|---------------------------|
|                  | $\Omega_{f_0}$  | $\sigma^{RIXS}(0^\circ)$ | $\sigma^{RIXS}(45^\circ)$ | $\sigma^{RIXS}(90^\circ)$ | $\Omega_{f_0}$ | $\sigma^{RIXS}(0^\circ)$ | $\sigma^{RIXS}(45^\circ)$ | $\sigma^{RIXS}(90^\circ)$ |
| 1A <sub>g</sub>  | 0.00            | 0.37922                  | 0.58543                   | 0.79163                   | 0.00           | 0.37921                  | 0.58837                   | 0.79753                   |
| 2A <sub>g</sub>  | 7.72            | 0.00902                  | 0.01351                   | 0.01801                   | 7.72           | 0.00920                  | 0.01380                   | 0.01839                   |
| 3A <sub>g</sub>  | 9.71            | 0.00071                  | 0.00106                   | 0.00142                   | 9.75           | 0.00063                  | 0.00095                   | 0.00126                   |
| 4A <sub>g</sub>  | 10.22           | 0.00001                  | 0.00002                   | 0.00003                   | 10.31          | 0.00006                  | 0.00009                   | 0.00011                   |
| 1B <sub>1g</sub> | 0.20            | 0.00000                  | 0.00000                   | 0.00000                   | 0.66           | 0.00000                  | 0.00000                   | 0.00000                   |
| 2B <sub>1g</sub> | 7.95            | 0.00000                  | 0.00000                   | 0.00000                   | 7.65           | 0.00000                  | 0.00000                   | 0.00000                   |
| 3B <sub>1g</sub> | 9.45            | 0.00000                  | 0.00000                   | 0.00000                   | 9.12           | 0.00000                  | 0.00000                   | 0.00000                   |
| 1B <sub>2g</sub> | 3.05            | 0.00195                  | 0.00170                   | 0.00146                   | 3.42           | 0.00270                  | 0.00236                   | 0.00202                   |
| 2B <sub>2g</sub> | 8.37            | 0.00001                  | 0.00001                   | 0.00001                   | 8.56           | 0.00001                  | 0.00001                   | 0.00001                   |
| 3B <sub>2g</sub> | 8.50            | 0.00001                  | 0.00001                   | 0.00001                   | 8.70           | 0.00001                  | 0.00001                   | 0.00001                   |
| 4B <sub>2g</sub> | 9.38            | 0.00259                  | 0.00227                   | 0.00194                   | 9.32           | 0.01232                  | 0.01078                   | 0.00924                   |
| 5B <sub>2g</sub> | 9.53            | 0.00179                  | 0.00156                   | 0.00133                   | 9.59           | 0.00126                  | 0.00110                   | 0.00095                   |
| 6B <sub>2g</sub> | 9.86            | 0.03024                  | 0.02646                   | 0.02268                   | 9.75           | 0.00445                  | 0.00389                   | 0.00333                   |
| 7B <sub>2g</sub> | 10.03           | 0.00780                  | 0.00683                   | 0.00585                   | 9.90           | 0.01686                  | 0.01475                   | 0.01264                   |
| 8B <sub>2g</sub> | 10.14           | 0.00012                  | 0.00011                   | 0.00009                   | 10.23          | 0.02827                  | 0.02474                   | 0.02121                   |
| 9B <sub>2g</sub> | 10.31           | 0.00073                  | 0.00063                   | 0.00054                   | 10.32          | 0.00042                  | 0.00037                   | 0.00031                   |
| 1B <sub>3g</sub> | 3.04            | 0.00194                  | 0.00170                   | 0.00146                   | 3.24           | 0.00127                  | 0.00111                   | 0.00095                   |
| 2B <sub>3g</sub> | 8.24            | 0.17948                  | 0.15704                   | 0.13461                   | 8.41           | 0.18660                  | 0.16327                   | 0.13995                   |
| 3B <sub>3g</sub> | 9.24            | 0.00000                  | 0.00000                   | 0.00000                   | 8.93           | 0.00006                  | 0.00005                   | 0.00005                   |
| 4B <sub>3g</sub> | 9.76            | 0.00191                  | 0.00167                   | 0.00143                   | 9.80           | 0.00160                  | 0.00140                   | 0.00120                   |
| 5B <sub>3g</sub> | 10.08           | 0.01292                  | 0.01130                   | 0.00969                   | 9.92           | 0.00211                  | 0.00184                   | 0.00158                   |
| 6B <sub>3g</sub> | 10.18           | 0.00253                  | 0.00222                   | 0.00190                   | 10.26          | 0.00000                  | 0.00000                   | 0.00000                   |
| 7B <sub>3g</sub> | 10.29           | 0.00330                  | 0.00289                   | 0.00247                   | 10.32          | 0.00707                  | 0.00619                   | 0.00530                   |

#### 4.11. Benzene cation: Orbitals involved in dominant RIXS transitions

TABLE S12: Benzene cation (unrelaxed geometry): Orbitals involved in the dominant RIXS transition using the dominant sum-over-state term in the RIXS moments and the corresponding NTOs of one-photon absorption and emission processes involving the initial, final, and intermediate states. NTO isosurface is 0.05.  $c$  denotes a core-level transition.

| Electronic transition  | $f$<br>(a.u.) | Orbital transition            | Hole NTO                                                                            | $\sigma_K^2$ | Particle NTO                                                                         |
|------------------------|---------------|-------------------------------|-------------------------------------------------------------------------------------|--------------|--------------------------------------------------------------------------------------|
| $2B_{3g}$              | 0.000000      | $5a_g \rightarrow 1b_{3g}$    | 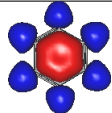  | 0.74         |   |
| $cB_{1u}$ (absorption) | 0.081929      | $1b_{2u} \rightarrow 1b_{3g}$ |   | 0.68         |   |
| $cB_{2u}$ (emission)   | 0.019527      | $5a_g \rightarrow 1b_{2u}$    |  | 0.56         |  |

Net  $2B_{3g}$  RIXS orbital transition:  $5a_g \rightarrow 1b_{2u} \rightarrow 1b_{3g}$

#### 4.12. Benzene: Experimental RIXS

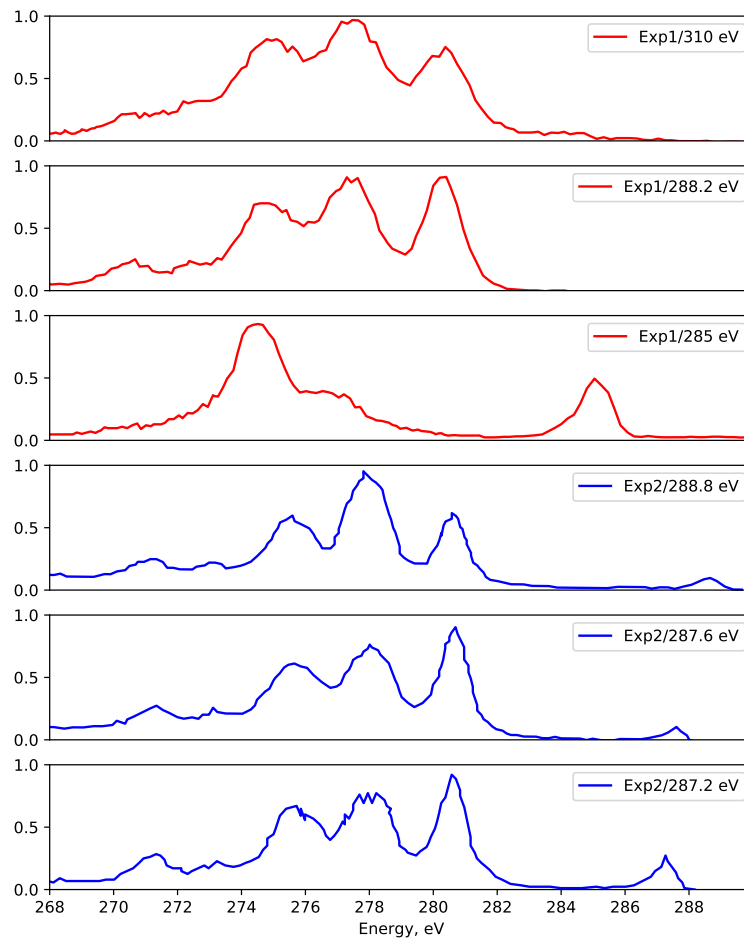

FIG. S4: Benzene XES and RIXS spectra from Refs. 1 (marked as 'Exp1', in red) and 2 (marked as 'Exp2', in blue).

- 
- <sup>1</sup> P. Skytt, J. Guo, N. Wassdahl, J. Nordgren, Y. Luo, and H. Ågren, Probing symmetry breaking upon core excitation with resonant x-ray fluorescence, *Phys. Rev. A* **52**, 3572 (1995).
- <sup>2</sup> F. Hennies, S. Polyutov, I. Minkov, A. Pietzsch, M. Nagasono, H. Ågren, L. Triguero, M.-N. Piancastelli, W. Wurth, F. Gel'mukhanov, and A. Föhlisch, Dynamic interpretation of resonant x-ray Raman scattering: Ethylene and benzene, *Phys. Rev. A* **76**, 032505 (2007).
